# Supplementary material for: Dynamic tubulation of mitochondria drives mitochondrial network formation
Source: PubMed Central journal article supplement — Cell Res. 2015 Jul 24;25(10):1108–20. doi: 10.1038/cr.2015.89 (PMC4650629; doi:10.1038/cr.2015.89), 2015-07-24
Supplement: cr201589x1.pdf [file cr201589x1.pdf]

## Supplementary information, Figure S1

|                                                                                 |                |
|---------------------------------------------------------------------------------|----------------|
| Diameter of mitochondrial tube in EM image (nm)                                 | 93.76 ± 12.50  |
| Diameter of mitochondrial body in EM image (nm)                                 | 648.16 ± 83.75 |
| Ratio of mitochondrial diameter to tube diameter in EM image                    | 8.23 ± 0.17    |
| Duration of dynamic tubulation (seconds)                                        | 11.16 ± 1.17   |
| Frequency of dynamic tubulation in networked mitochondria (incidence/min)       | 1.82 ± 0.11    |
| Frequency of dynamic tubulation in fragmented mitochondria (incidence/min)      | 3.44 ± 0.08    |
| Ratio of normal tubulation to dynamic tubulation in NRK cell fluorescent images | 2.59 ± 0.10    |
| Percentage of fusion events mediated by dynamic tubulation                      | 29.05 ± 4.94   |

**Figure S1** Parameters of mitochondrial dynamic tubulation. Some parameters of mitochondrial tubulation were measured, “±” indicates SD.
