# Supplementary material for: Dynamic tubulation of mitochondria drives mitochondrial network formation
Source: PubMed Central journal article supplement — Cell Res. 2015 Jul 24;25(10):1108–20. doi: 10.1038/cr.2015.89 (PMC4650629; doi:10.1038/cr.2015.89), 2015-07-24
Supplement: cr201589x2.pdf [file cr201589x2.pdf]

## Supplementary information, Figure S2

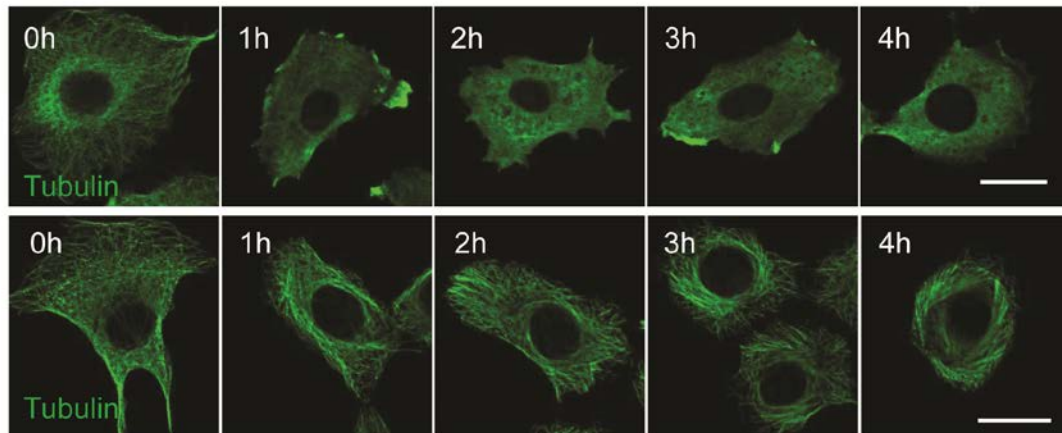

**Figure S2** Effect of nocodazole and taxol treatment on microtubule organization. NRK cells were treated with 5 µg/ml nocodazole (top row) or 2.5 µM taxol (bottom row) for increasing lengths of time and stained with antibodies against tubulin. Scale bar, 20 µm.
