# Supplementary material for: Dynamic tubulation of mitochondria drives mitochondrial network formation
Source: PubMed Central journal article supplement — Cell Res. 2015 Jul 24;25(10):1108–20. doi: 10.1038/cr.2015.89 (PMC4650629; doi:10.1038/cr.2015.89), 2015-07-24
Supplement: cr201589x3.pdf [file cr201589x3.pdf]

### Supplementary information, Figure S3

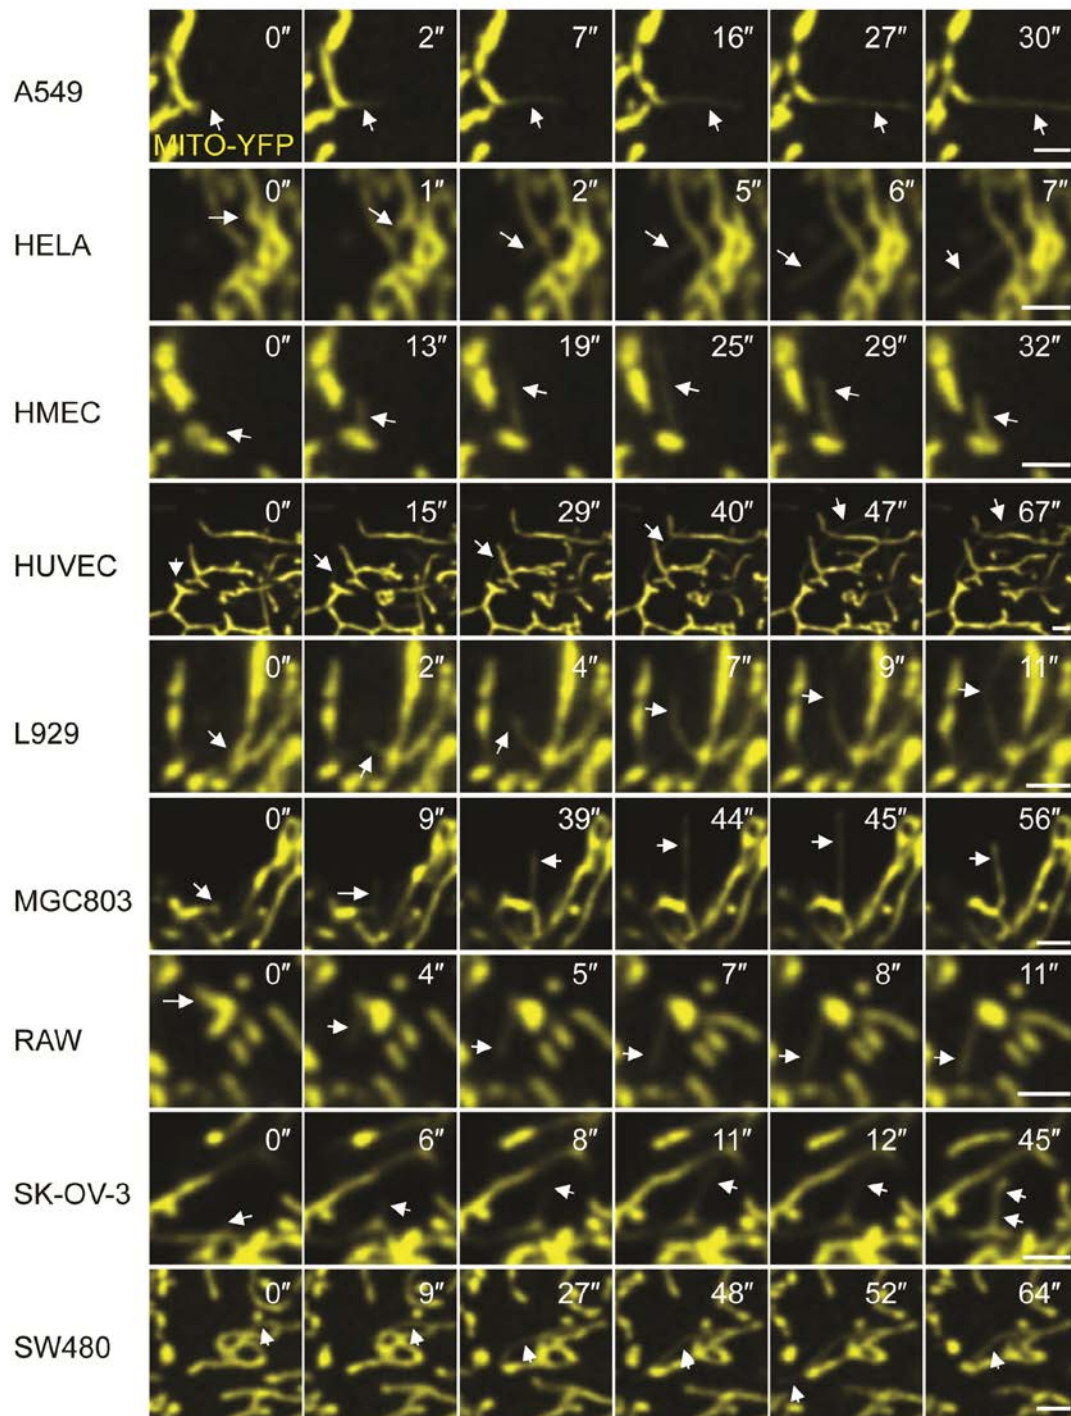

**Figure S3** Dynamic tubulation of mitochondria is a common phenomenon in different cell lines. The indicated cell lines were transfected with Mito-YFP and observed with a spinning-disk microscope system. Scale bar, 2  $\mu$ m. Structures indicated by the white arrows are dynamic tubules.
