# Supplementary material for: Dynamic tubulation of mitochondria drives mitochondrial network formation
Source: PubMed Central journal article supplement — Cell Res. 2015 Jul 24;25(10):1108–20. doi: 10.1038/cr.2015.89 (PMC4650629; doi:10.1038/cr.2015.89), 2015-07-24
Supplement: cr201589x4.pdf [file cr201589x4.pdf]

## Supplementary information, Figure S4

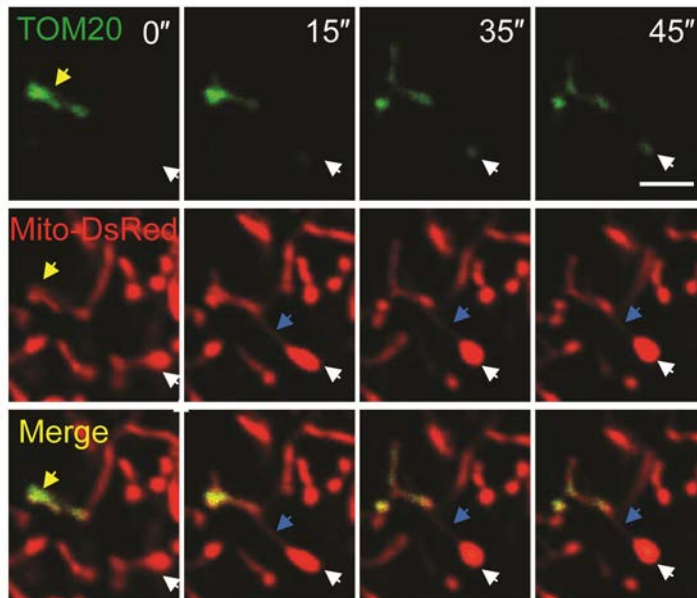

**Figure S4** Transport of material between mitochondria by dynamic tubules. NRK cells were transfected with Mito-DsRed and TOM20-PAGFP, and then observed by confocal microscopy after laser activation of TOM20-PAGFP. Scale bar, 2  $\mu\text{m}$ . Blue arrows indicate a dynamic tubule, yellow arrows indicate a TOM20-PAGFP activated mitochondria, and white arrows indicate a tubulated mitochondrion.
