# Supplementary material for: Dynamic tubulation of mitochondria drives mitochondrial network formation
Source: PubMed Central journal article supplement — Cell Res. 2015 Jul 24;25(10):1108–20. doi: 10.1038/cr.2015.89 (PMC4650629; doi:10.1038/cr.2015.89), 2015-07-24
Supplement: cr201589x5.pdf [file cr201589x5.pdf]

**Supplementary information, Figure S5**

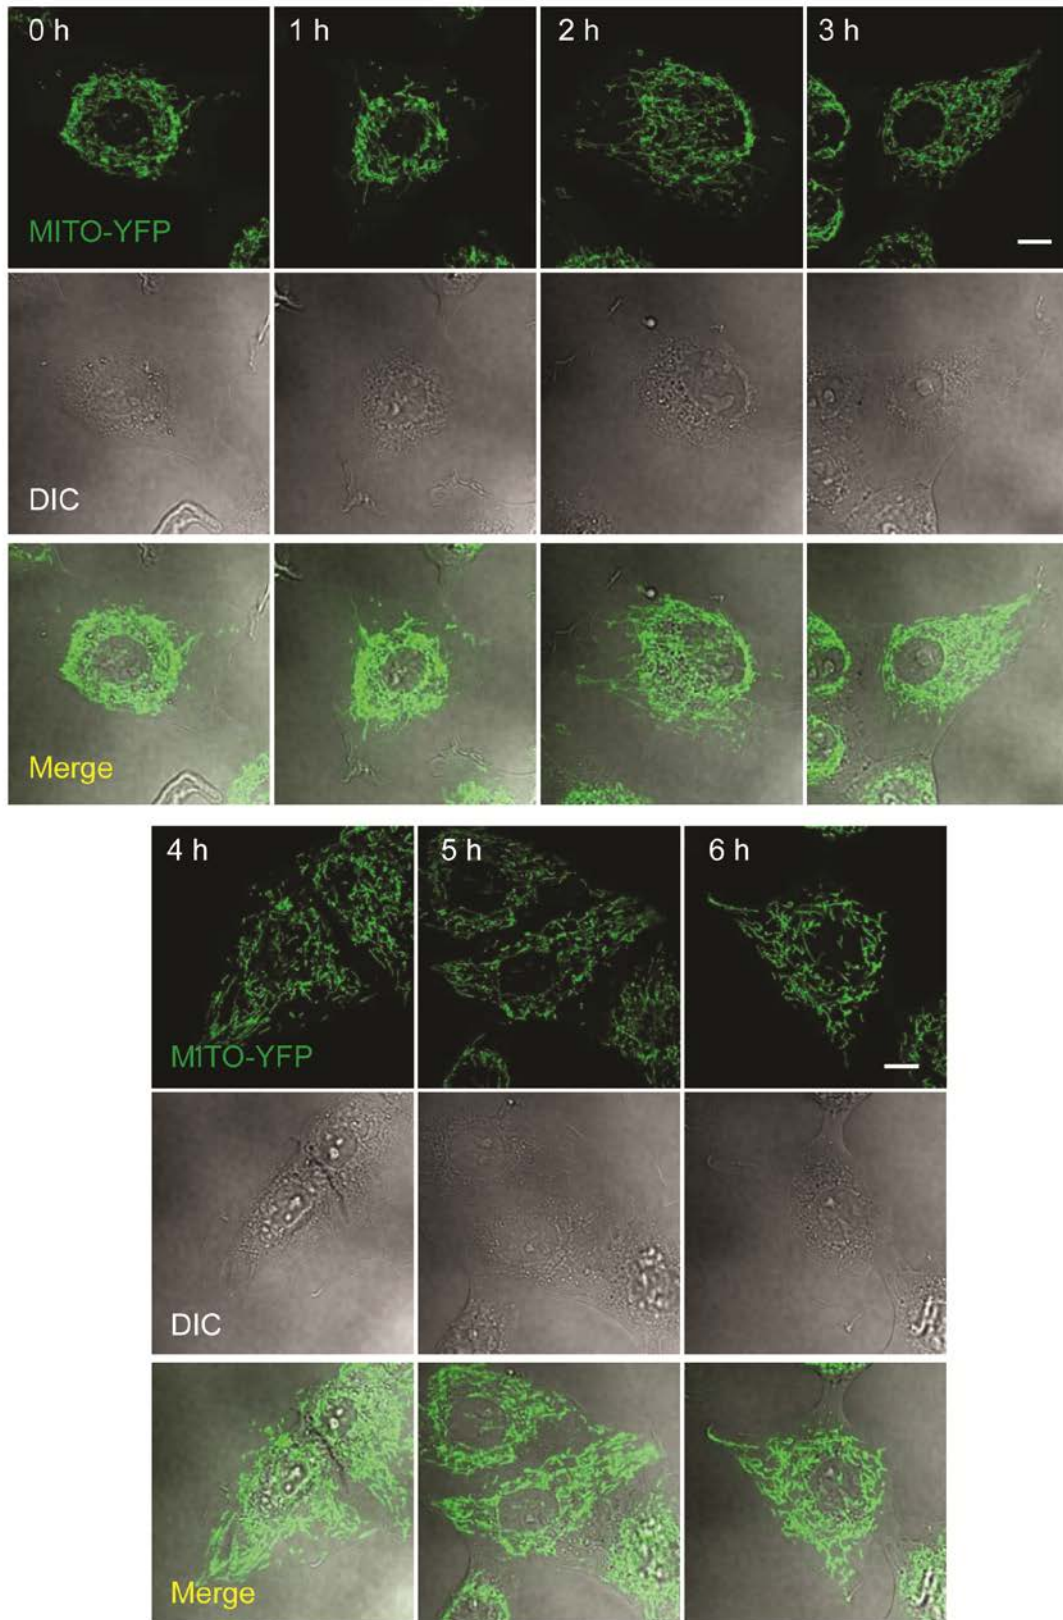

**Figure S5** KIF5B drives peripheral mitochondrial network formation. *KIF5B*<sup>-/-</sup> NRK cells that stably express Mito-YFP and TET-ON-KIF5B were treated with 0.5 µg/ml tetracycline, and observed by confocal microscopy. Scale bar, 10 µm.
