# Supplementary material for: Dynamic tubulation of mitochondria drives mitochondrial network formation
Source: PubMed Central journal article supplement — Cell Res. 2015 Jul 24;25(10):1108–20. doi: 10.1038/cr.2015.89 (PMC4650629; doi:10.1038/cr.2015.89), 2015-07-24
Supplement: cr201589x6.pdf [file cr201589x6.pdf]

## Supplementary information, Figure S6

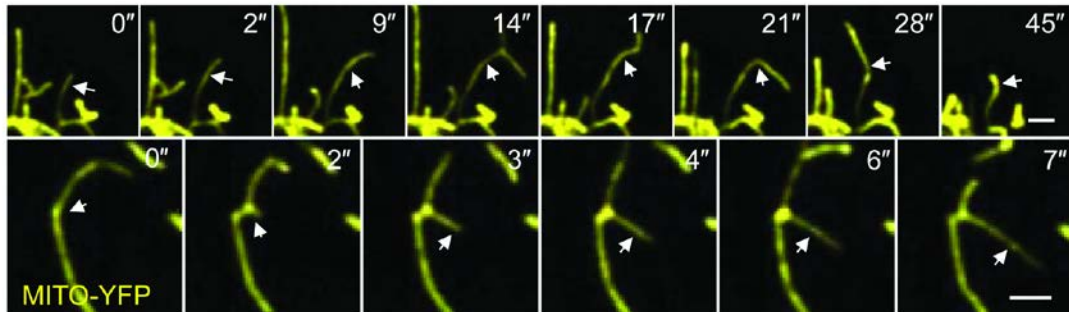

**Figure S6** KIF5B drives mitochondrial dynamic tubulation. *KIF5B*<sup>-/-</sup> NRK cells that stably express Mito-YFP and TET-ON-KIF5B were treated with 0.5  $\mu\text{g/ml}$  tetracycline for 1 h, and then observed with a spinning-disk microscope system. Scale bar, 2  $\mu\text{m}$ . White arrows indicate dynamic tubules.
