# Supplementary material for: Dynamic tubulation of mitochondria drives mitochondrial network formation
Source: PubMed Central journal article supplement — Cell Res. 2015 Jul 24;25(10):1108–20. doi: 10.1038/cr.2015.89 (PMC4650629; doi:10.1038/cr.2015.89), 2015-07-24
Supplement: cr201589x8.pdf [file cr201589x8.pdf]

## Supplementary information, Figure S8

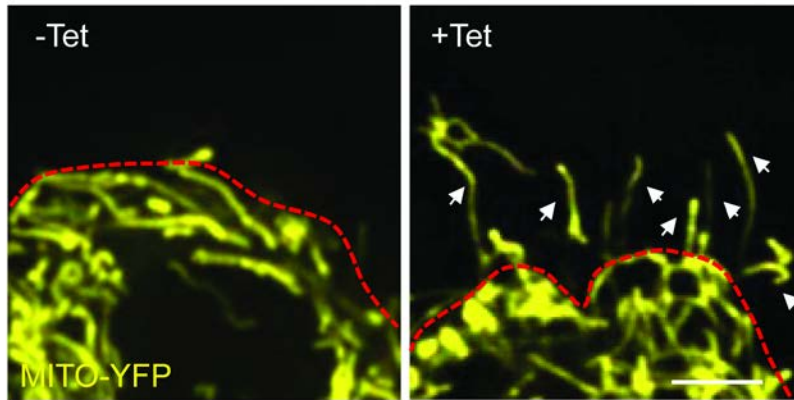

**Figure S8** Tetracycline-induced expression of KIF5B increases the frequency of outwardly-extending dynamic tubulation. *KIF5B*<sup>-/-</sup> NRK cells that stably express Mito-YFP and TET-ON-KIF5B were treated with or without 0.5 µg/ml tetracycline for 1 h. Scale bar, 5 µm. Red dashed lines indicate the boundary of the mitochondrial network before tubulation; and white arrows indicate dynamic tubules.
