# Supplementary material for: Dynamic tubulation of mitochondria drives mitochondrial network formation
Source: PubMed Central journal article supplement — Cell Res. 2015 Jul 24;25(10):1108–20. doi: 10.1038/cr.2015.89 (PMC4650629; doi:10.1038/cr.2015.89), 2015-07-24
Supplement: cr201589x10.pdf [file cr201589x10.pdf]

**Supplementary information, Figure S10**

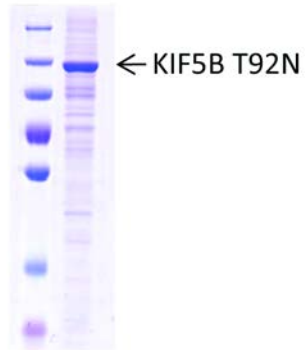

**Figure S10** Analysis of purified full-length KIF5B T92N by Coomassie staining.
