# Supplementary material for: Dynamic tubulation of mitochondria drives mitochondrial network formation
Source: PubMed Central journal article supplement — Cell Res. 2015 Jul 24;25(10):1108–20. doi: 10.1038/cr.2015.89 (PMC4650629; doi:10.1038/cr.2015.89), 2015-07-24
Supplement: cr201589x11.pdf [file cr201589x11.pdf]

## Supplementary information, Figure S11

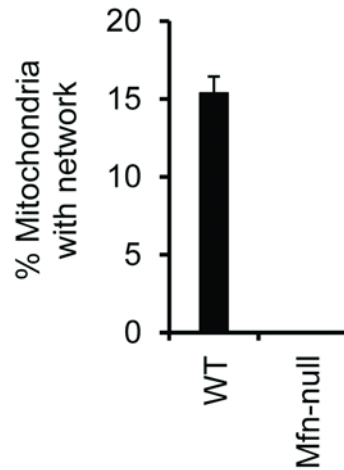

**Figure S11** Mfn-null mitochondria could not form network *in vitro*. Mitochondria from wild-type and Mfn-null MEF cells were tested in the *in vitro* reconstitution system for their ability to form mitochondrial networks. Formation of mitochondrial networks was quantified.  $n > 100$  from three independent experiments. Error bars indicate SD.
