# Supplementary material for: Dynamic tubulation of mitochondria drives mitochondrial network formation
Source: PubMed Central journal article supplement — Cell Res. 2015 Jul 24;25(10):1108–20. doi: 10.1038/cr.2015.89 (PMC4650629; doi:10.1038/cr.2015.89), 2015-07-24
Supplement: cr201589x12.pdf [file cr201589x12.pdf]

## Supplementary information, Figure S12

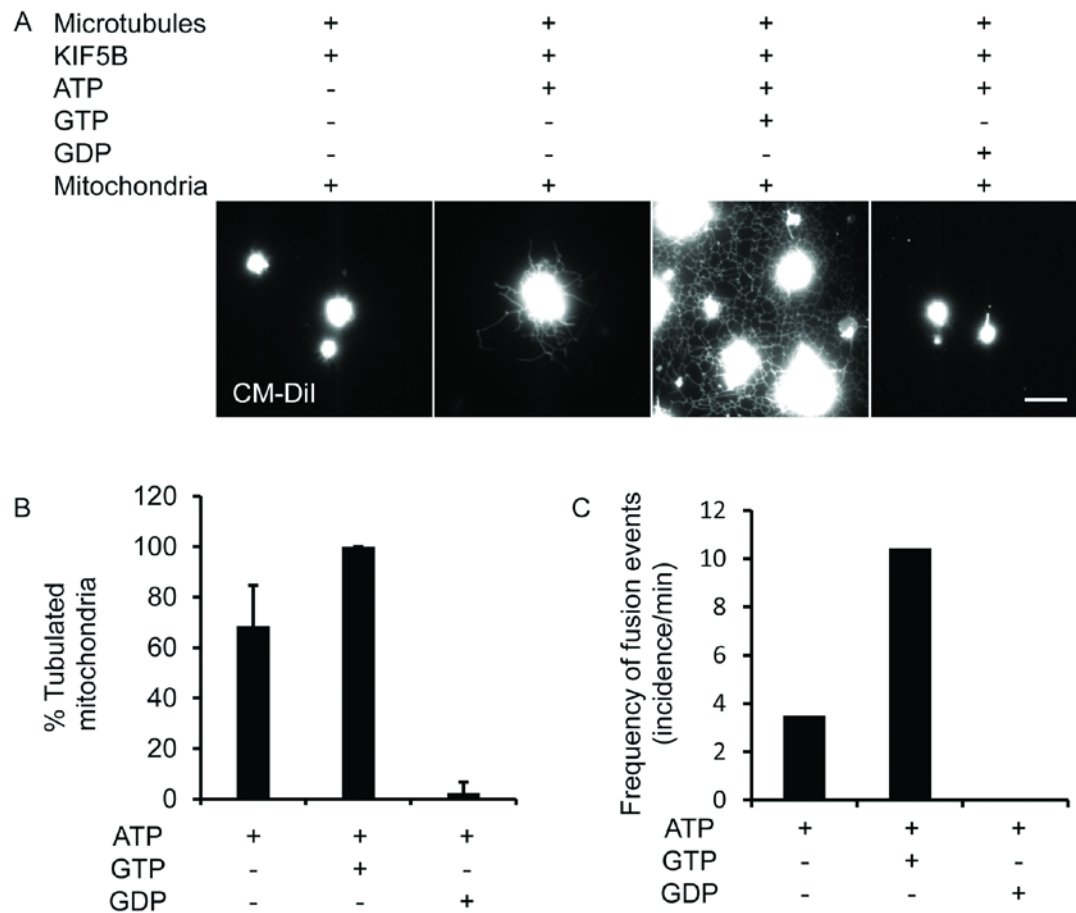

**Figure S12** GTP promotes mitochondrial network formation *in vitro*. **(A)** Purified mitochondria were labeled by CM-Dil, incubated with KIF5B, transferred into flow chamber channels coated with polymerized microtubules and visualized in the presence of ATP, ATP and GTP or ATP and GDP. Images were collected with a TIRF microscope. Scale bar, 10  $\mu\text{m}$ . **(B)** The percentage of tubulated mitochondria from **A** was determined.  $n > 100$  from three independent experiments. Error bars indicate SD. **(C)** Fusion events in **A** were quantified.
