# Supplementary material for: Dynamic tubulation of mitochondria drives mitochondrial network formation
Source: PubMed Central journal article supplement — Cell Res. 2015 Jul 24;25(10):1108–20. doi: 10.1038/cr.2015.89 (PMC4650629; doi:10.1038/cr.2015.89), 2015-07-24
Supplement: cr201589x13.pdf [file cr201589x13.pdf]

## Supplementary information, Figure S13

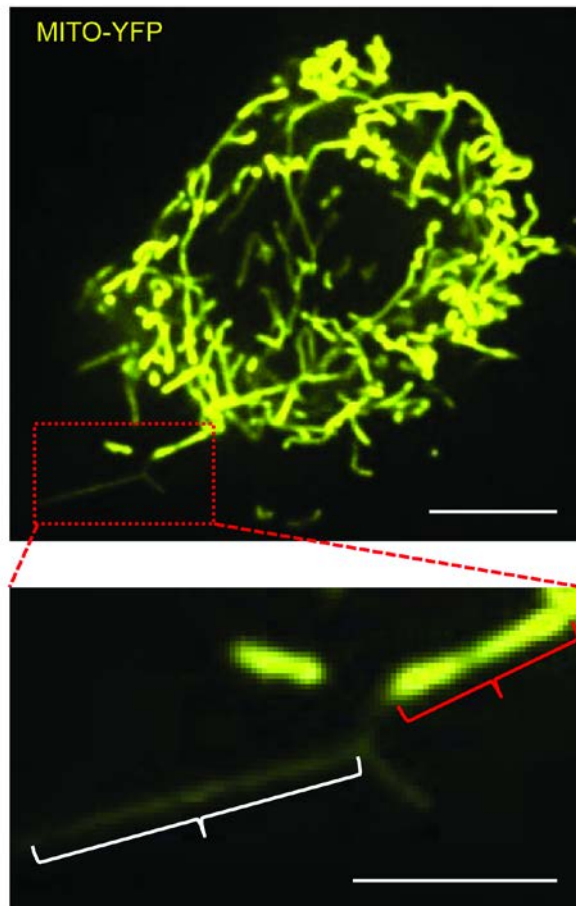

**Figure S13** Schematic diagram for measurement of diameter of normal and dynamic mitochondrial tubules in NRK cell fluorescent images. KIF5B-knockout NRK cells that stably express Mito-YFP and TET-ON-KIF5B were treated with 0.5  $\mu\text{g/ml}$  tetracycline for 1 h, and then observed with a spinning-disk microscope system. Scale bar, 10  $\mu\text{m}$ ; scale bar in zoomed panel, 5  $\mu\text{m}$ . Red brace indicates normal mitochondrial tube and white brace indicates dynamic mitochondrial tube.
